# Supplementary material for: 3D graphene/δ-MnO2 aerogels for highly efficient and reversible removal of heavy metal ions
Source: Royal Society of Chemistry journal article supplement (doi:10.1039/c5ta08106h), 2016-01-01
Supplement: c5ta08106h1.pdf [file c5ta08106h1.pdf]

# Supporting Information

## 3D graphene/MnO<sub>2</sub> aerogels for high efficient and reversible removal of heavy metal ions

Juntao Liu,<sup>a</sup> Xiao Ge,<sup>a</sup> Xinxin Ye,<sup>a</sup> Guozhong Wang,<sup>a</sup> Haimin Zhang,<sup>a</sup> Hongjian  
Zhou,<sup>a</sup> Yunxia Zhang,<sup>a\*</sup> and Huijun Zhao<sup>a,b</sup>

### Preparation of Birnessite-Type MnO<sub>2</sub> Nanosheets

In a typical experiment, 2.4 g NaOH, 0.5 g PVP, and 2.97 g MnCl<sub>2</sub>·4H<sub>2</sub>O were added to ethylene glycol (90 mL) in a 250 mL round flask. H<sub>2</sub>O<sub>2</sub> (10 mL) was then added to the obtained red solution under magnetic stirring. After being refluxed for 1 h, the mixture was cooled to room temperature naturally. The resulting black precipitate was collected by centrifugation and washed with ethanol several times to remove the impurities and PVP.

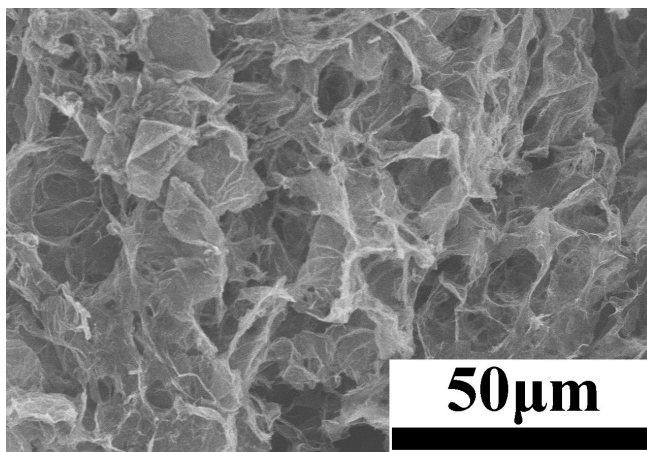

**Fig.S1** SEM image of graphene in the absence of Gly.

\* Key Laboratory of Materials Physics, Centre for Environmental and Energy Nanomaterials, Anhui Key Laboratory of Nanomaterials and Nanotechnology, Institute of Solid State Physics, Chinese Academy of Sciences, Hefei 230031, China. Email: [yxzhang@issp.ac.cn](mailto:yxzhang@issp.ac.cn)

<sup>b</sup>Centre for Clean Environment and Energy, Gold Coast Campus, Griffith University, Queensland 4222, Australia.

† Electronic supplementary information (ESI) available: Preparation of birnessite-type MnO<sub>2</sub> nanosheets; SEM image of graphene in the absence of Gly; EDS mapping of graphene/MnO<sub>2</sub> sample.

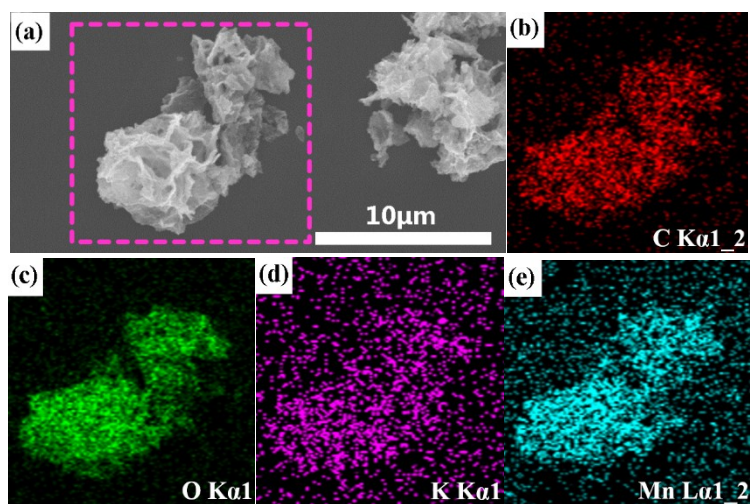

**Fig.S2** TEM image of graphene/MnO<sub>2</sub> and the corresponding elemental mapping images: (b) C; (c) O; (d) K; (e) Mn.
